# Supplementary material for: Impact of different fibre ingredients on a low-FODMAP biscuit model system
Source: Royal Society of Chemistry journal article supplement (doi:10.1039/d3fo00830d), 2023-01-01
Supplement: d3fo00830d1.pdf [file d3fo00830d1.pdf]

## Supplementary

Table S1: List and definition of sensory properties.

| <b>Attributes</b>                   | <b>Description</b>                                                                       |
|-------------------------------------|------------------------------------------------------------------------------------------|
| <i>Evenness of colour</i>           | The overall evenness of colour of the biscuit                                            |
| <i>Hardness of first bite</i>       | Force needed to break the biscuit on first bite using the molars                         |
| <i>Sound at break of first bite</i> | Level of noise produced when biting into the biscuit with the molars                     |
| <i>Hardness during chewing/</i>     | Force required to break down the biscuit during chewing                                  |
| <i>Graininess</i>                   | Degree to which the biscuit contains particles of various sizes                          |
| <i>Dryness</i>                      | Perception of pastiness in the mouth in terms of salivation and difficulty in swallowing |
| <i>Buttery flavour</i>              | Intensity of buttery flavour perceived while chewing the biscuit                         |
| <i>Sweetness</i>                    | Intensity of sweetness of the biscuit                                                    |
| <i>Aftertaste</i>                   | The presence of an aftertaste 30 seconds after swallowing                                |

Table S2: ANOVA for the models of the response factors water absorption, biscuit hardness, diameter, lightness (L\*-value), dough hardness, dough stickiness and water activity.

| Response Factor             | Model                                  | ANOVA- Models |              |                        | ANOVA- Lack of Fit |         |                 |
|-----------------------------|----------------------------------------|---------------|--------------|------------------------|--------------------|---------|-----------------|
|                             |                                        | F-value       | P-value      | Significance           | F-value            | P-value | Significance    |
| <b>Water Absorption [%]</b> | Linear                                 | 241.605       | 0.866        | Not significant        | 241.605            | 0.004   | Significant     |
|                             | <i>Fibersym RW</i>                     | <i>0.179</i>  | <i>0.694</i> | <i>Not significant</i> |                    |         |                 |
|                             | <i>VITACEL L 600-30</i>                | <i>17.013</i> | <i>0.146</i> | <i>Not significant</i> |                    |         |                 |
|                             | <i>AgriFiber BFG</i>                   | <i>25.771</i> | <i>0.071</i> | <i>Not significant</i> |                    |         |                 |
|                             | Two-way interaction                    | 295.466       | 0.719        | Not significant        | 295.466            | 0.003   | Significant     |
|                             | <i>Fibersym RW * VITACEL L 600-30</i>  | <i>0.338</i>  | <i>0.592</i> | <i>Not significant</i> |                    |         |                 |
|                             | <i>Fibersym RW * AgriFiber BFG</i>     | <i>0.338</i>  | <i>0.592</i> | <i>Not significant</i> |                    |         |                 |
|                             | <i>VITACEL L 600-30* AgriFiber BFG</i> | <i>9.734</i>  | <i>0.065</i> | <i>Not significant</i> |                    |         |                 |
| <b>Biscuit Hardness [N]</b> | Linear                                 | 1.331         | 0.011        | Significant            | 1.331              | 0.456   | Not Significant |
|                             | <i>Fibersym RW</i>                     | <i>1.032</i>  | <i>0.367</i> | <i>Not significant</i> |                    |         |                 |
|                             | <i>VITACEL L 600-30</i>                | <i>21.879</i> | <i>0.016</i> | <i>Significant</i>     |                    |         |                 |
|                             | <i>AgriFiber BFG</i>                   | <i>15.831</i> | <i>0.016</i> | <i>Significant</i>     |                    |         |                 |
|                             | Two-way interaction                    | 1.382         | 0.457        | Not significant        | 1.382              | 0.434   | Not Significant |
|                             | <i>Fibersym RW * VITACEL L 600-30</i>  | <i>3.574</i>  | <i>0.032</i> | <i>Significant</i>     |                    |         |                 |
|                             | <i>Fibersym RW * AgriFiber BFG</i>     | <i>0.095</i>  | <i>0.773</i> | <i>Not significant</i> |                    |         |                 |
|                             | <i>VITACEL L 600-30* AgriFiber BFG</i> | <i>0.080</i>  | <i>0.792</i> | <i>Not significant</i> |                    |         |                 |

|                           |                                        |                |              |                        |        |       |                 |
|---------------------------|----------------------------------------|----------------|--------------|------------------------|--------|-------|-----------------|
| <b>Diameter [mm]</b>      | Linear                                 | 32.776         | 0.435        | Not significant        | 32.776 | 0.008 | Significant     |
|                           | <i>Fibersym RW</i>                     | <i>0.001</i>   | <i>0.983</i> | <i>Not significant</i> |        |       |                 |
|                           | <i>VITACEL L 600-30</i>                | <i>0.701</i>   | <i>0.450</i> | <i>Not significant</i> |        |       |                 |
|                           | <i>AgriFiber BFG</i>                   | <i>44.684</i>  | <i>0.260</i> | <i>Not significant</i> |        |       |                 |
|                           | Two-way interaction                    | 13.478         | 0.074        | Not significant        | 13.478 | 0.278 | Not Significant |
|                           | <i>Fibersym RW * VITACEL L 600-30</i>  | <i>15.880</i>  | <i>0.163</i> | <i>Not significant</i> |        |       |                 |
|                           | <i>Fibersym RW * AgriFiber BFG</i>     | <i>63.009</i>  | <i>0.136</i> | <i>Not significant</i> |        |       |                 |
|                           | <i>VITACEL L 600-30* AgriFiber BFG</i> | <i>150.084</i> | <i>0.255</i> | <i>Not significant</i> |        |       |                 |
| <b>L*-value [-]</b>       | Linear                                 | 86.871         | 0.088        | Not significant        | 86.871 | 0.002 | Significant     |
|                           | <i>Fibersym RW</i>                     | <i>0.013</i>   | <i>0.916</i> | <i>Not significant</i> |        |       |                 |
|                           | <i>VITACEL L 600-30</i>                | <i>0.572</i>   | <i>0.491</i> | <i>Not significant</i> |        |       |                 |
|                           | <i>AgriFiber BFG</i>                   | <i>0.420</i>   | <i>0.552</i> | <i>Not significant</i> |        |       |                 |
|                           | Two-way interaction                    | 95.376         | 0.462        | Not significant        | 95.376 | 0.002 | Significant     |
|                           | <i>Fibersym RW * VITACEL L 600-30</i>  | <i>3.533</i>   | <i>0.133</i> | <i>Not significant</i> |        |       |                 |
|                           | <i>Fibersym RW * AgriFiber BFG</i>     | <i>0.313</i>   | <i>0.606</i> | <i>Not significant</i> |        |       |                 |
|                           | <i>VITACEL L 600-30* AgriFiber BFG</i> | <i>1.594</i>   | <i>0.275</i> | <i>Not significant</i> |        |       |                 |
| <b>Dough Hardness [N]</b> | Linear                                 | 10.802         | 0.065        | Not significant        | 10.802 | 0.037 | Significant     |
|                           | <i>Fibersym RW</i>                     | <i>1.920</i>   | <i>0.238</i> | <i>Not significant</i> |        |       |                 |
|                           | <i>VITACEL L 600-30</i>                | <i>23.916</i>  | <i>0.810</i> | <i>Not significant</i> |        |       |                 |
|                           | <i>AgriFiber BFG</i>                   | <i>0.920</i>   | <i>0.392</i> | <i>Not significant</i> |        |       |                 |
|                           | Two-way interaction                    | 7.505          | 0.056        | Not significant        | 7.505  | 0.062 | Significant     |

|                             |                                        |        |       |                        |       |       |                 |
|-----------------------------|----------------------------------------|--------|-------|------------------------|-------|-------|-----------------|
|                             | <i>Fibersym RW * VITACEL L 600-30</i>  | 3.683  | 0.127 | <i>Not significant</i> |       |       |                 |
|                             | <i>Fibersym RW * AgriFiber BFG</i>     | 18.088 | 0.013 | <i>Not significant</i> |       |       |                 |
|                             | <i>VITACEL L 600-30* AgriFiber BFG</i> | 0.000  | 0.994 | <i>Not significant</i> |       |       |                 |
| <b>Dough Stickiness [N]</b> | Linear                                 | 2.772  | 0.060 | Not significant        | 2.772 | 0.217 | Not Significant |
|                             | <i>Fibersym RW</i>                     | 0.060  | 0.818 | <i>Not significant</i> |       |       |                 |
|                             | <i>VITACEL L 600-30</i>                | 18.303 | 0.013 | <i>Significant</i>     |       |       |                 |
|                             | <i>AgriFiber BFG</i>                   | 1.393  | 0.303 | <i>Not significant</i> |       |       |                 |
|                             | Two-way interaction                    | 3.410  | 0.763 | Not significant        | 3.410 | 0.171 | Not Significant |
|                             | <i>Fibersym RW * VITACEL L 600-30</i>  | 2.633  | 0.180 | <i>Not significant</i> |       |       |                 |
|                             | <i>Fibersym RW * AgriFiber BFG</i>     | 0.039  | 0.854 | <i>Not significant</i> |       |       |                 |
|                             | <i>VITACEL L 600-30* AgriFiber BFG</i> | 0.118  | 0.748 | <i>Not significant</i> |       |       |                 |
| <b>Water activity [-]</b>   | Linear                                 | 3.229  | 0.771 | Not significant        | 3.229 | 0.182 | Not Significant |
|                             | <i>Fibersym RW</i>                     | 4.285  | 0.107 | <i>Not significant</i> |       |       |                 |
|                             | <i>VITACEL L 600-30</i>                | 0.376  | 0.573 | <i>Not significant</i> |       |       |                 |
|                             | <i>AgriFiber BFG</i>                   | 0.512  | 0.514 | <i>Not significant</i> |       |       |                 |
|                             | Two-way interaction                    | 2.218  | 0.276 | Not significant        | 2.218 | 0.276 | Not Significant |
|                             | <i>Fibersym RW * VITACEL L 600-30</i>  | 0.690  | 0.453 | <i>Not significant</i> |       |       |                 |
|                             | <i>Fibersym RW * AgriFiber BFG</i>     | 1.474  | 0.292 | <i>Not significant</i> |       |       |                 |
|                             | <i>VITACEL L 600-30* AgriFiber BFG</i> | 15.190 | 0.018 | <i>Significant</i>     |       |       |                 |

---

1 **Table S3:** Analysis of variance (ANOVA) results for response models of the response surface methodology (RSM) trial.

| <b>Response</b>                  | <b>Unit</b> | <b>Minimum</b> | <b>Maximum</b> | <b>Model</b> | <b>P-value</b> | <b>LOF</b><br><b>P-value</b> |
|----------------------------------|-------------|----------------|----------------|--------------|----------------|------------------------------|
| Dough Hardness                   | N           | 1.482          | 8.98           | Linear       | 0.145          | 0.678                        |
| Dough Stickiness                 | N           | 0.144          | 0.328          | Linear       | 0.078          | 0.156                        |
| Biscuit Hardness                 | N           | 18.92          | 78.875         | Linear       | 1.9x10-4*      | 0.034*                       |
| Diameter                         | mm          | 67.67          | 72.459         | Linear       | 0.321          | 0.266                        |
| Lightness (L* )                  | -           | 48.76          | 78.25533381    | Linear       | 0.289          | 0.567                        |
| Water activity (a <sub>w</sub> ) | -           | 0.09           | 0.251          | Linear       | 0.096          | 0.096                        |

2 \*p≤0.05; LOF- Lack of Fit
